# Supplementary material
Source: PubMed Central journal article supplement (PMC5521860)

SUPPLEMENTARY DATA

**Supplementary Table S1. Peptides generated after incubation of A779 with neprilysin for up to 48 hours.**

|                                                                                                       | <b>0 h</b> | <b>24 h</b> | <b>48 h</b> |
|-------------------------------------------------------------------------------------------------------|------------|-------------|-------------|
| A779-(1-7)                                                                                            | 100        | 7.2         | 0           |
| A779-(1-2)                                                                                            | 0          | 12.8        | 22.0        |
| A779-(1-3)                                                                                            | 0          | 0.6         | 0.2         |
| A779-(1-4)                                                                                            | 0          | 5.9         | 3.1         |
| A779-(3-4)                                                                                            | 0          | 18.5        | 23.3        |
| A779-(4-7)                                                                                            | 0          | 0.6         | 0.1         |
| A779-(5-7)                                                                                            | 0          | 53.9        | 50.8        |
| A779-(6-7)                                                                                            | 0          | 0.5         | 0.5         |
| Data are extraction ion current (EIC) areas for each peptide expressed as percent of total ion count. |            |             |             |

SUPPLEMENTARY DATA

**Supplementary Figure S1. Neprilysin cleaves A779 at four sites.**

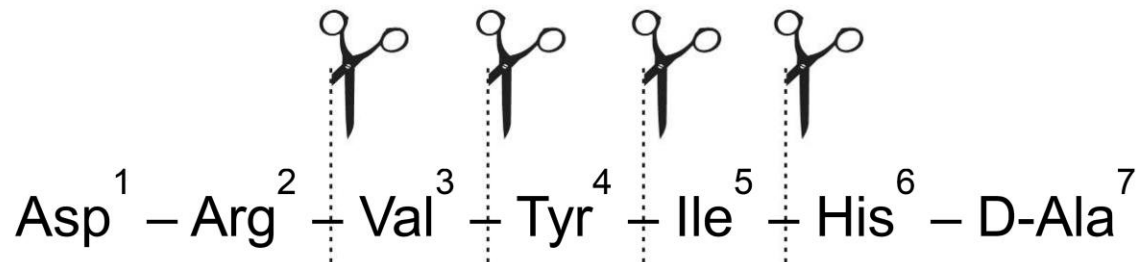

SUPPLEMENTARY DATA

**Supplementary Figure S2. The MasR antagonist, A779, promotes insulin secretion in islets expressing neprilysin.** Insulin secretion in response to 2.8 mM or 20 mM glucose from C57BL/6.NEP<sup>+/+</sup> islets after 48-hour culture in the absence or presence of 1  $\mu$ M A779. Data are mean  $\pm$  SEM. \*p<0.05 vs vehicle; n=11.

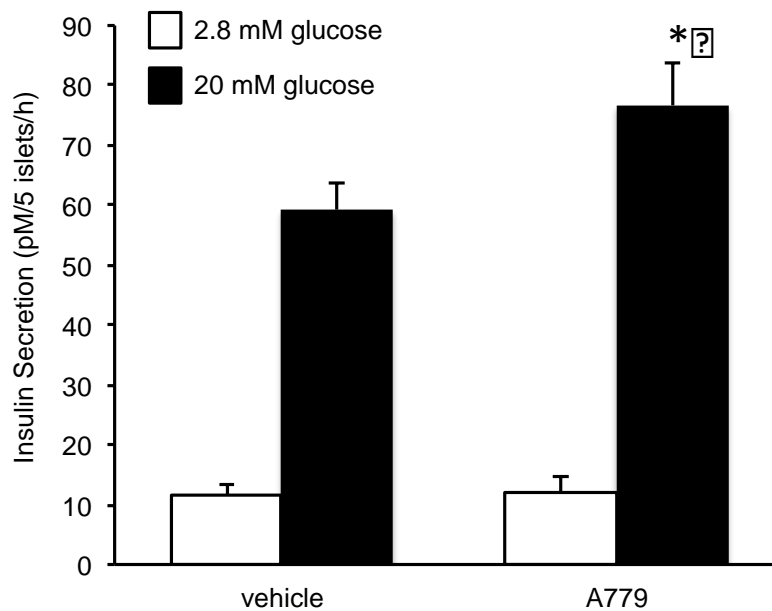

SUPPLEMENTARY DATA

**Supplementary Figure S3. Short-term exposure to Ang-(1-7) or Ang-(1-2) does not potentiate GSIS.** Insulin secretion from C57BL/6.NEP<sup>+/+</sup> (A; n=6) and C57BL/6.NEP<sup>-/-</sup> (B; n=6) islets in response to 1-hour exposure to 2.8 mM or 20 mM glucose in the absence or presence of 1 nM angiotensin-(1-7) or 1 nM angiotensin-(1-2). Data are mean  $\pm$  SEM.

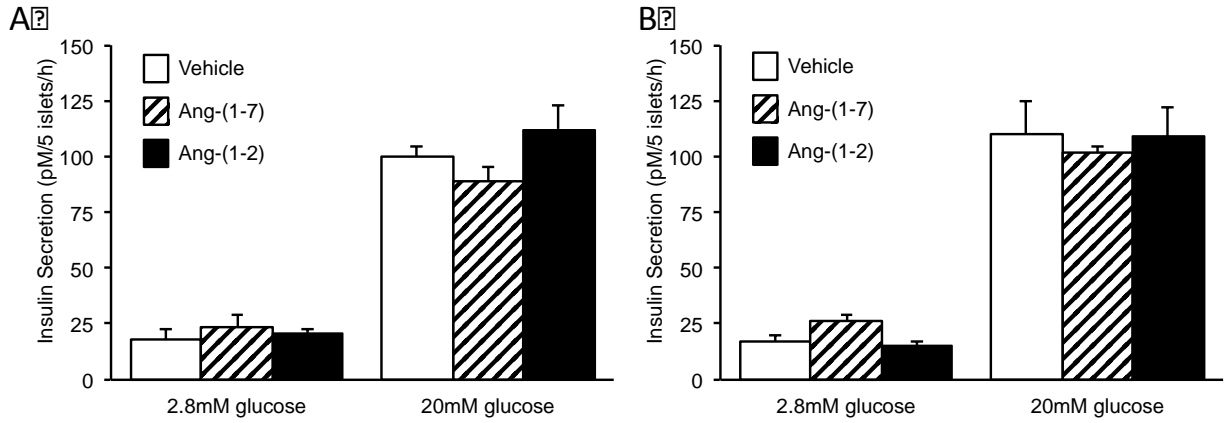

Supplement: DB161318SupplementaryData.pdf [file DB161318SupplementaryData.pdf]
